# Supplementary material
Source: PubMed Central journal article supplement (PMC2764551)
Supplement: NIHMS83271-supplement-IpaH_S1.pdf [file NIHMS83271-supplement-IpaH_S1.pdf]

**a.**

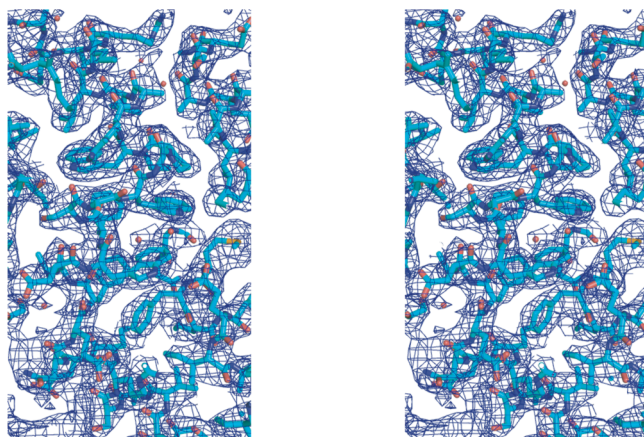

**b.**

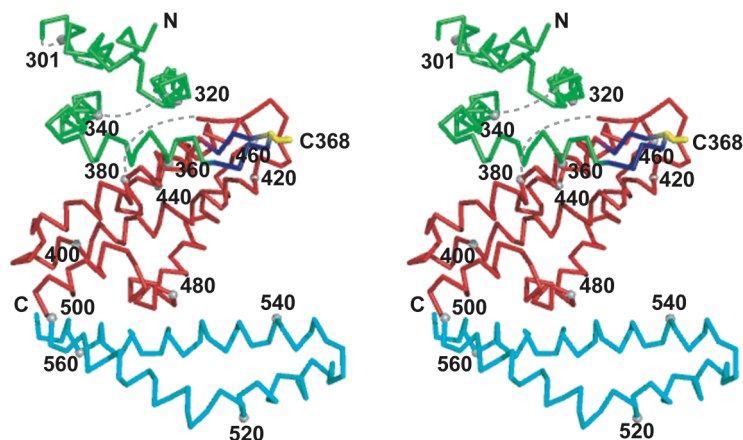

**Supplementary Figure 1:** IpaH-CTD structure determination. **(a)** Stereo view of the experimental electron density map generated using density-modified SAD phases from autoSHARP<sup>38</sup>, contoured at  $1\sigma$ . A portion of the final model displayed as a stick representation in a region centred around helix  $\alpha$ 10 of molecule C is also shown, demonstrating the fit of the electron density. **(b)** Stereo ribbon view of the tertiary structure of the IpaH C-terminal domain (molecule A). The N-, middle and C-terminal lobes are colored green, red and blue respectively and disordered regions are represented by a grey dash (**Fig. 4c**). The position of the  $C\alpha$  of residue 301, followed by every 20<sup>th</sup> residue beginning with residue 320 is denoted with a grey ball and labeled.
